# Supplementary material
Source: Springer Nature journal article supplement (https://www.springermedizin.de/resource/supplementary/12992_2012_187_MOESM3_ESM.pdf/9616772)
Supplement: MOESM3 [file 9616772]

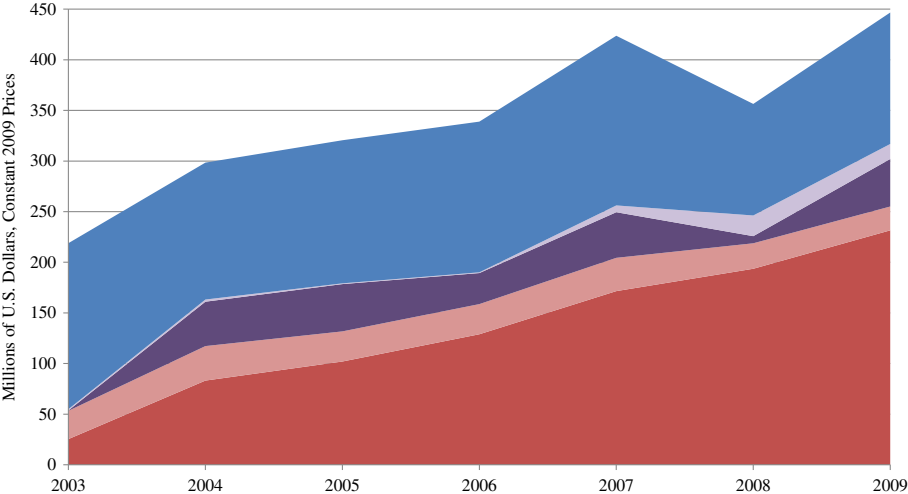

- Assistance for all other health program areas or support systems
- Assistance for malaria and tuberculosis from other donors (excludes GFATM)
- Global Fund for AIDS, Tuberculosis, and Malaria
- Assistance for HIV/AIDS from other donors (excludes U.S. and GFATM)
- U.S. assistance for HIV/AIDS, including PEPFAR
